# Supplementary material for: Superparamagnetic cobalt ferrite nanoparticles synthesized by gamma irradiation
Source: Royal Society of Chemistry journal article supplement (doi:10.1039/d2nj05433g), 2022-12-27
Supplement: d2nj05433g1.pdf [file d2nj05433g1.pdf]

## Electronic Supplementary Information

### Superparamagnetic cobalt ferrite nanoparticles synthesized by gamma irradiation

Amel ZORAI,<sup>a,b</sup> Abdelhafid SOUICI,<sup>a\*</sup> Diana DRAGOE,<sup>c</sup> Eric RIVIERE,<sup>c</sup> Salim OUHENIA,<sup>a</sup> Jacqueline BELLONI,<sup>b</sup> and Mehran MOSTAFAVI<sup>b\*</sup>

<sup>a</sup>.Laboratoire de physico-chimie des matériaux et catalyse, Faculté des Sciences Exactes Université de Bejaia, Bejaia 06000, Algeria.

<sup>b</sup>.Institut de Chimie Physique, Université Paris-Saclay, CNRS 8000, Bâtiment 349, Campus d'Orsay, 15 Avenue Jean Perrin, 91405, Orsay Cedex, France.

<sup>c</sup>.Institut de Chimie Moléculaire et des Matériaux d'Orsay, UMR 8182, CNRS, Université Paris-Saclay, Bâtiment Henri Moissan, 19 avenue des Sciences, 91400, Orsay, France.

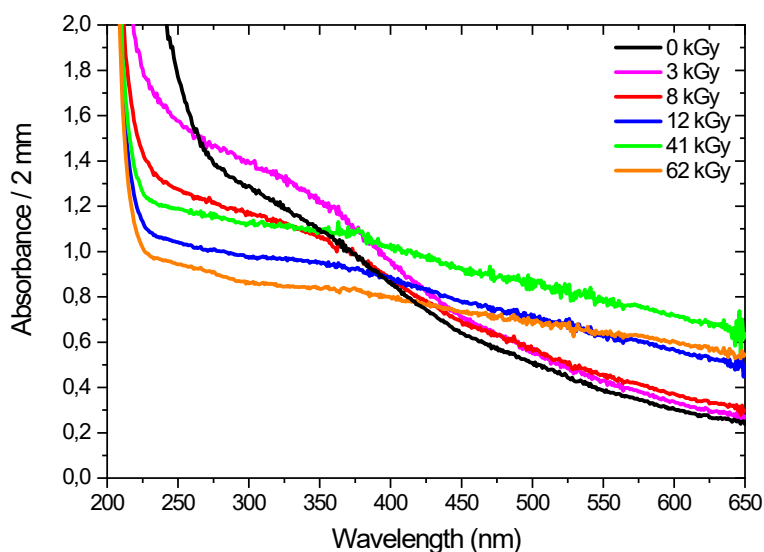

**Figure S11.** Optical absorption spectra at various  $\gamma$ -doses of a solution containing  $4 \times 10^{-3}$  mol  $L^{-1}$  iron (III) chloride hexahydrate ( $FeCl_3, 6H_2O$ ),  $2 \times 10^{-3}$  mol  $L^{-1}$  cobalt (II) chloride hexahydrate ( $CoCl_2, 6H_2O$ )  $10^{-3}$  mol  $L^{-1}$  PVP, and  $0.13$  mol  $L^{-1}$  isopropanol. The pH of solution is  $\approx 11.8$ .

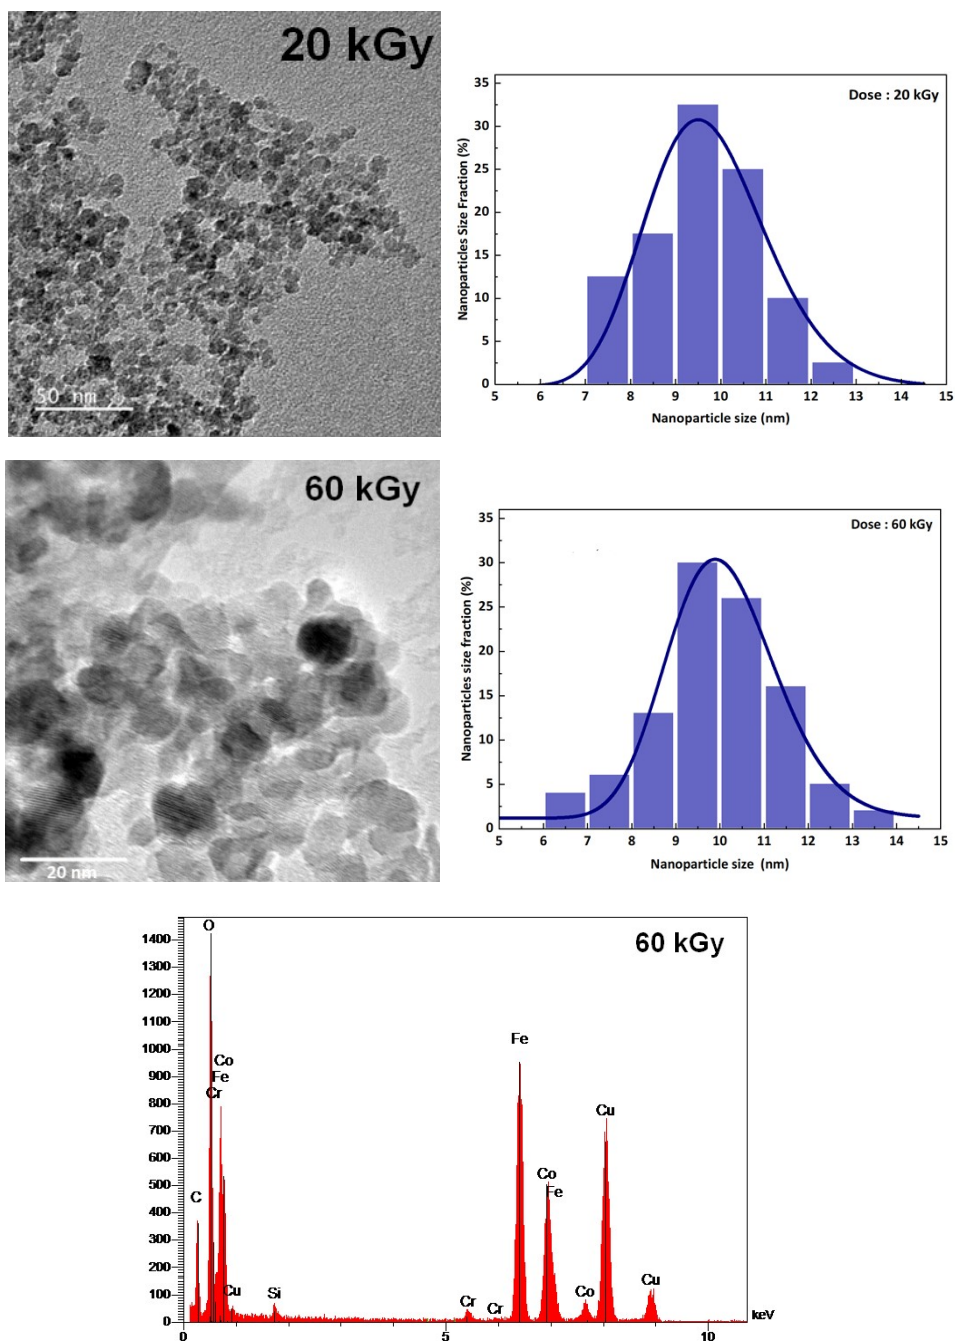

**Figure S12.** Top: HRTEM images and size distribution of CoFe<sub>2</sub>O<sub>4</sub> NPs radiation-induced at 20 kGy ( $D = 9.7 \pm 1.0$  nm). Middle : HRTEM images and size distribution of CoFe<sub>2</sub>O<sub>4</sub> NPs radiation-induced at 60 kGy ( $D = 10.1 \pm 1.5$  nm). Bottom: EDS spectrum of CoFe<sub>2</sub>O<sub>4</sub> at 60 kGy.

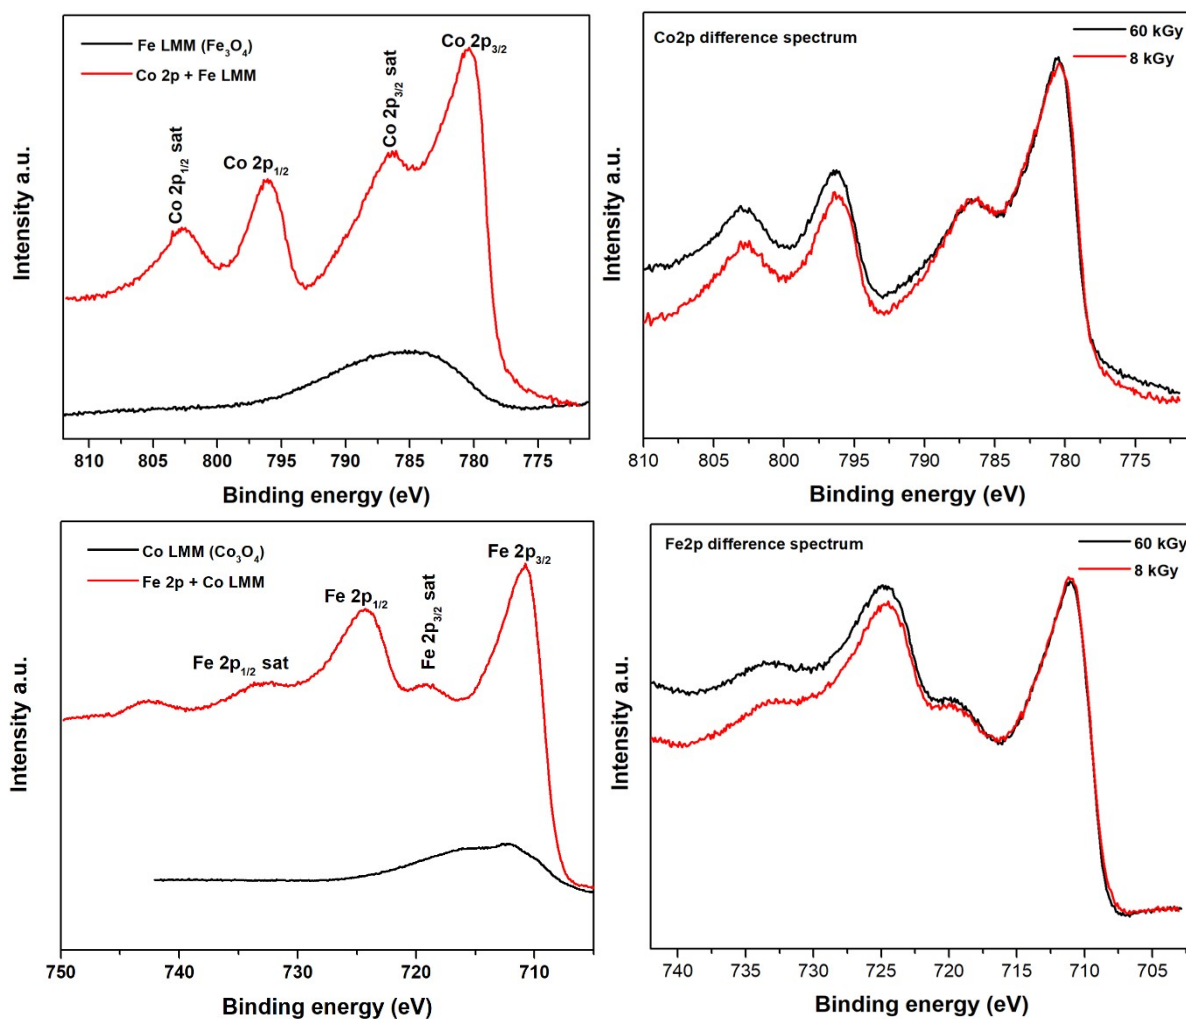

**Figure S13.** The Fe 2p and Co 2p core-level spectra together with the interfering Auger signals (left) and a superposition of Fe2p and Co2p difference spectra obtained for samples irradiated at 8 kGy and 60 kGy (right). Fe LMM was measured on a reference sample of  $\text{Fe}_3\text{O}_4$  and Co LMM on a reference  $\text{Co}_3\text{O}_4$ .

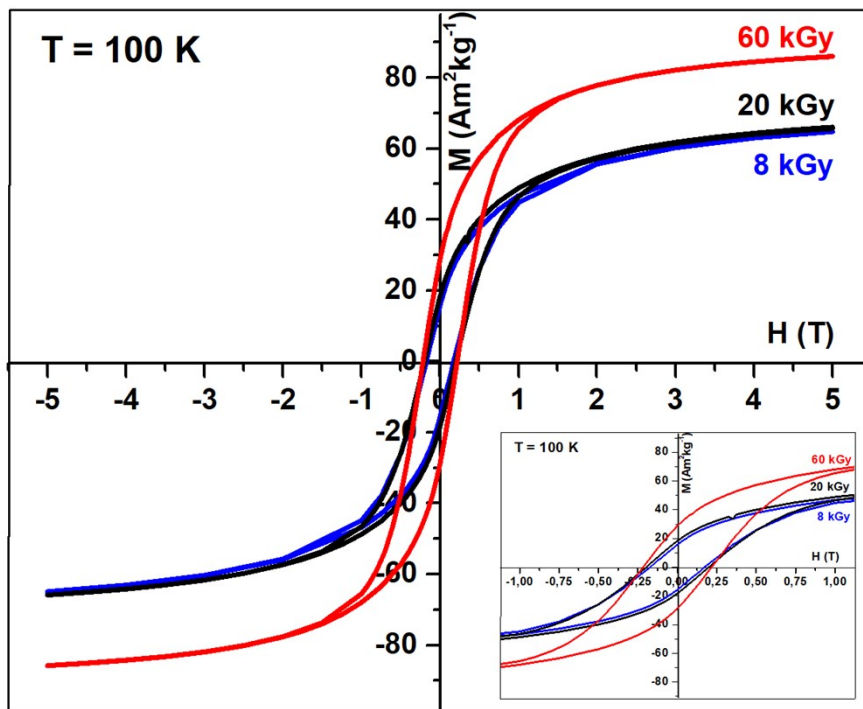

**Figure S14.** Hysteresis loops of the magnetization ( $M$ ) versus the magnetic field ( $H$ ), measured at  $T = 100 \text{ K}$ , of  $\text{CoFe}_2\text{O}_4$  nanoparticles formed at the doses 8, 20 and 60 kGy. Right inset: magnification of the low field region.

**Table S11.** Literature data on the synthesis and properties of cobalt ferrite  $\text{CoFe}_2\text{O}_4$  nanoparticles.

| Authors                 | Method                                                                       | Temperature of synthesis or treatment ( $^{\circ}\text{C}$ ) | Size D (nm) | Magnetic properties $M_s$ ( $\text{Am}^2 \text{kg}^{-1}$ ) | Reference       |
|-------------------------|------------------------------------------------------------------------------|--------------------------------------------------------------|-------------|------------------------------------------------------------|-----------------|
| Mooney et al. 2004      | Reduction by alkalide in ether                                               | Annealing at 200 - 1000                                      | 3 - 30      | 75                                                         | 22              |
| Herrera et al. 2013     | Thermal decomposition                                                        | 325                                                          | 5 - 12      | 10 - 50                                                    | 64              |
| Bohara et al. 2014      | High thermal decomposition                                                   | 100 - 210                                                    | 7           | 38                                                         | 20              |
| Gaudisson et al. 2014   | Reduction by boiling polyols (EG, PEG)                                       | Boiling point                                                | 6 - 11      | 48 - 71                                                    | 21              |
| Paramasivan et al. 2016 | Hydrothermal (PVP)                                                           | 200, then annealing at 400, 500, 600                         | 21 - 33     | 57 - 41                                                    | SI <sup>1</sup> |
| Li et al. 2016          | Organic process (oleic acid, oleylamine, tetradecanediol, and benzyl ether). | 110 - 295                                                    | 6 - 8       | 74 - 80                                                    | 54              |
| Raut et al. 2015        | Sol-gel auto-combustion, annealing then Irradiation                          | 70 – 110, then annealing at 600                              | 47 - 50     | 65 - 81                                                    | 16              |
| Raut et al. 2016        | Sol-gel auto-combustion, then Irradiation                                    | 70 – 110, then annealing at 600                              | 52 - 59     | 65 - 84                                                    | 60              |
| Angotzi et al. 2017     | Solvothermal seed-mediated growth                                            | 200                                                          | 8 - 12      | -                                                          | 17              |
| Zhang et al. 2017       | Thermal decomposition                                                        | 326                                                          | 4           | 30                                                         | 19              |
| Shams et al. 2018       | Coprecipitation                                                              | 60                                                           | 8           | 50                                                         | 17              |
| Darwish et al. 2019     | Coprecipitation                                                              | 60                                                           | 8           | 50 - 60                                                    | 62              |
| Gurgel et al. 2019      | Microwave-assisted hydrothermal                                              | 40                                                           | 6 - 15      | 54 - 65                                                    | SI <sup>2</sup> |
| Kumar et al. 2020       | Coprecipitation                                                              | Annealing at 300 - 900                                       | 10 - 40     | 37 - 71                                                    | 63              |
| Palade et al. 2020      | Hydrothermal pH 7 - 9                                                        | 200                                                          | 7.8 - 9.6   | 37.9 - 67.2                                                | 16              |
| Shanmugam et al. 2020   | Reduction by boiling glycol                                                  | Boiling point                                                | 7.8         | 41                                                         | SI <sup>3</sup> |

## References

1. P. Paramasivan and P. Venkatesh, *J. Supercond. Nov. Magn.*, 2016, **29**, 2805-2811.
2. A. L. Gurgel, A. E. Martinelli, O. L. de Aquino Conceição, M. M. Xavier Jr, M. A. M. Torres and D. M. de Araújo Melo, *J. Alloys Compd.*, 2019, **799**, 36-42.
3. S. Shanmugam and B. Subramanian, *Mater. Sci. Eng. B.*, 2020, **252**, 114451.
